# Supplementary material for: The role of antecedent conditions in translating precipitation events into extreme floods at catchment scale and in a large basin context
Source: Copernicus journal article supplement (doi:10.5194/egusphere-2024-909), 2024-04-11
Supplement: Supplementary file 1 [file egusphere-2024-909-supplement.pdf]

# **Supplementary material for "The role of antecedent conditions in translating precipitation events into extreme floods at catchment scale and in a large basin context"**

**Maria Staudinger et al.**

## **S1 Seasonality of annual maximum flood (AMF) and annual maximum precipitation (AMP)**

Figure S1 compares the seasonality of the AMF and AMP for the studied sub-catchments.

## **S2 Features for the random forest density distributions of the considered variables**

Figures S2, S3, S4, illustrate the distribution of the variables triggering precipitation, soil moisture, and snow pack, respectively, used for the classification random forest from each sub-catchment and Figure S5 the distribution of the discharge conditions at relevant locations in the routing system.

## **S3 Sensitivity test of the matching/non-matching definition using the a multiple of the average catchment response time (ACRT)**

The effect of the definition of what is a matching and what is a non-matching event was tested by applying different windows based on the average catchment response time (ARCT) on the amount and distribution of the non-matching events, i.e. using 0.5 times ACRT (Figure S6), using ACRT (Figure S7), using 1.5 times ACRT (Figure S8), and using 2 times ACRT (Figure S9).

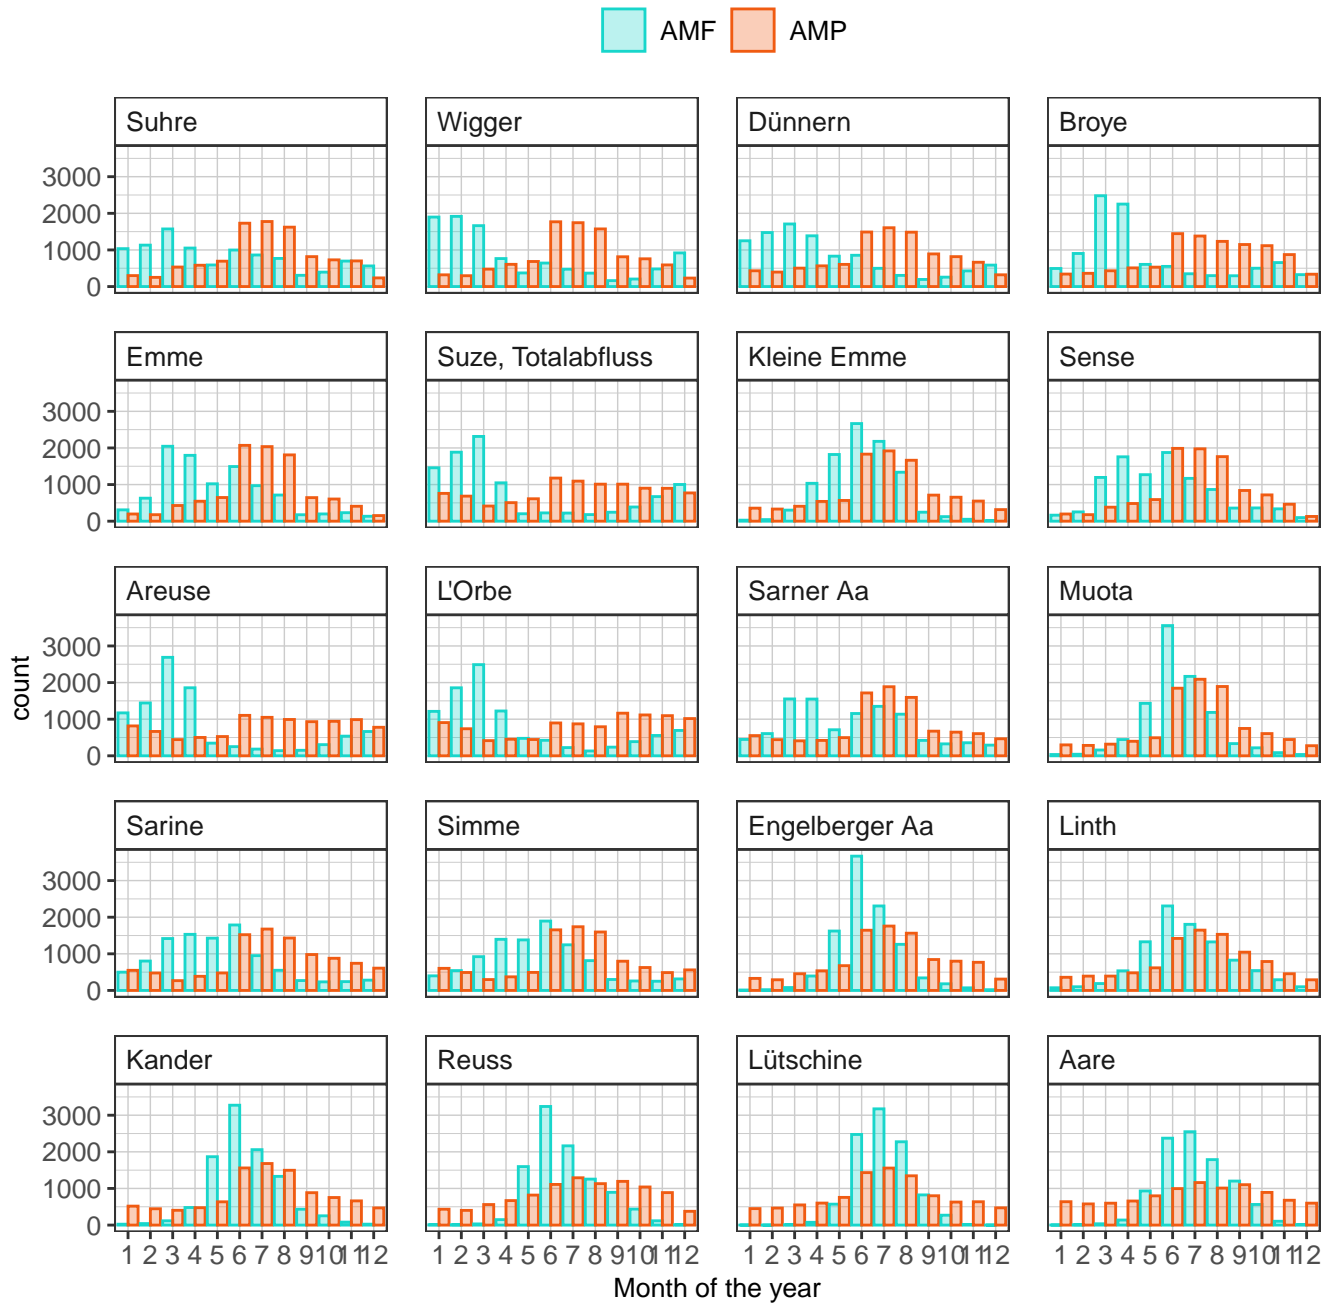

**Figure S1.** Comparison of the seasonality of the annual maximum discharge (AMF) versus the annual maximum precipitation (AMP), defined as the sum over the average catchment response time.

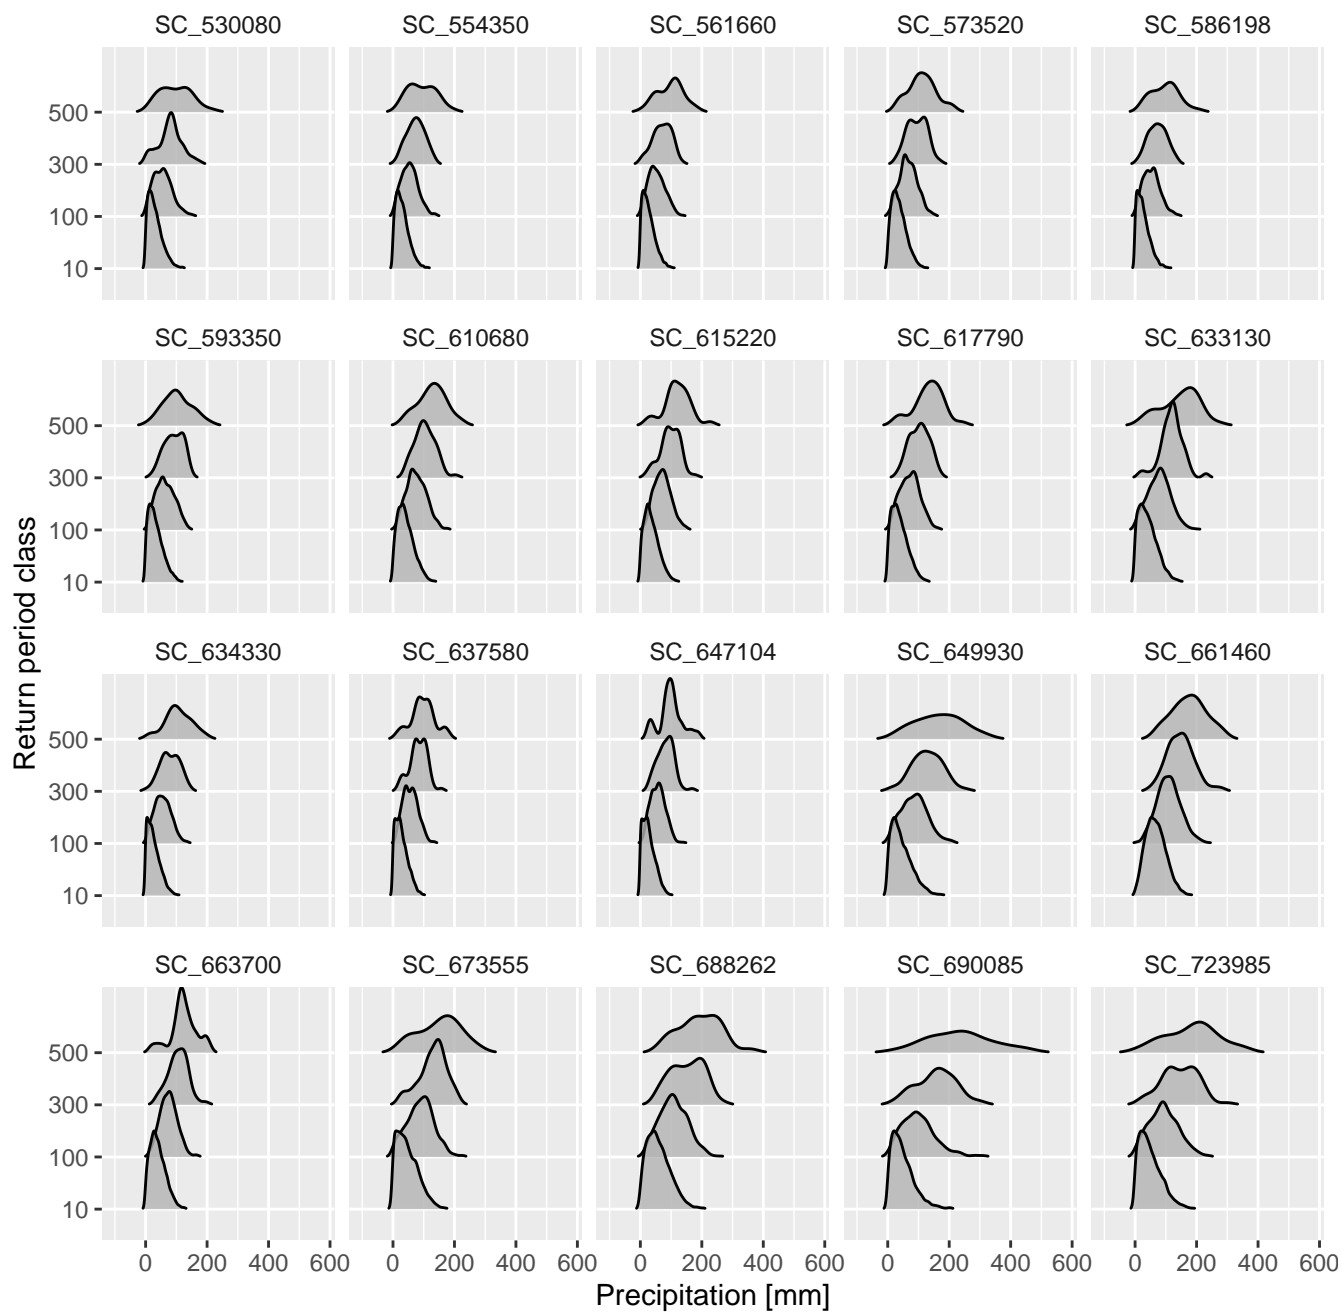

**Figure S2.** Density distributions of the precipitation in the sub-catchments associated to the flood at the outlet of the Aare basin.

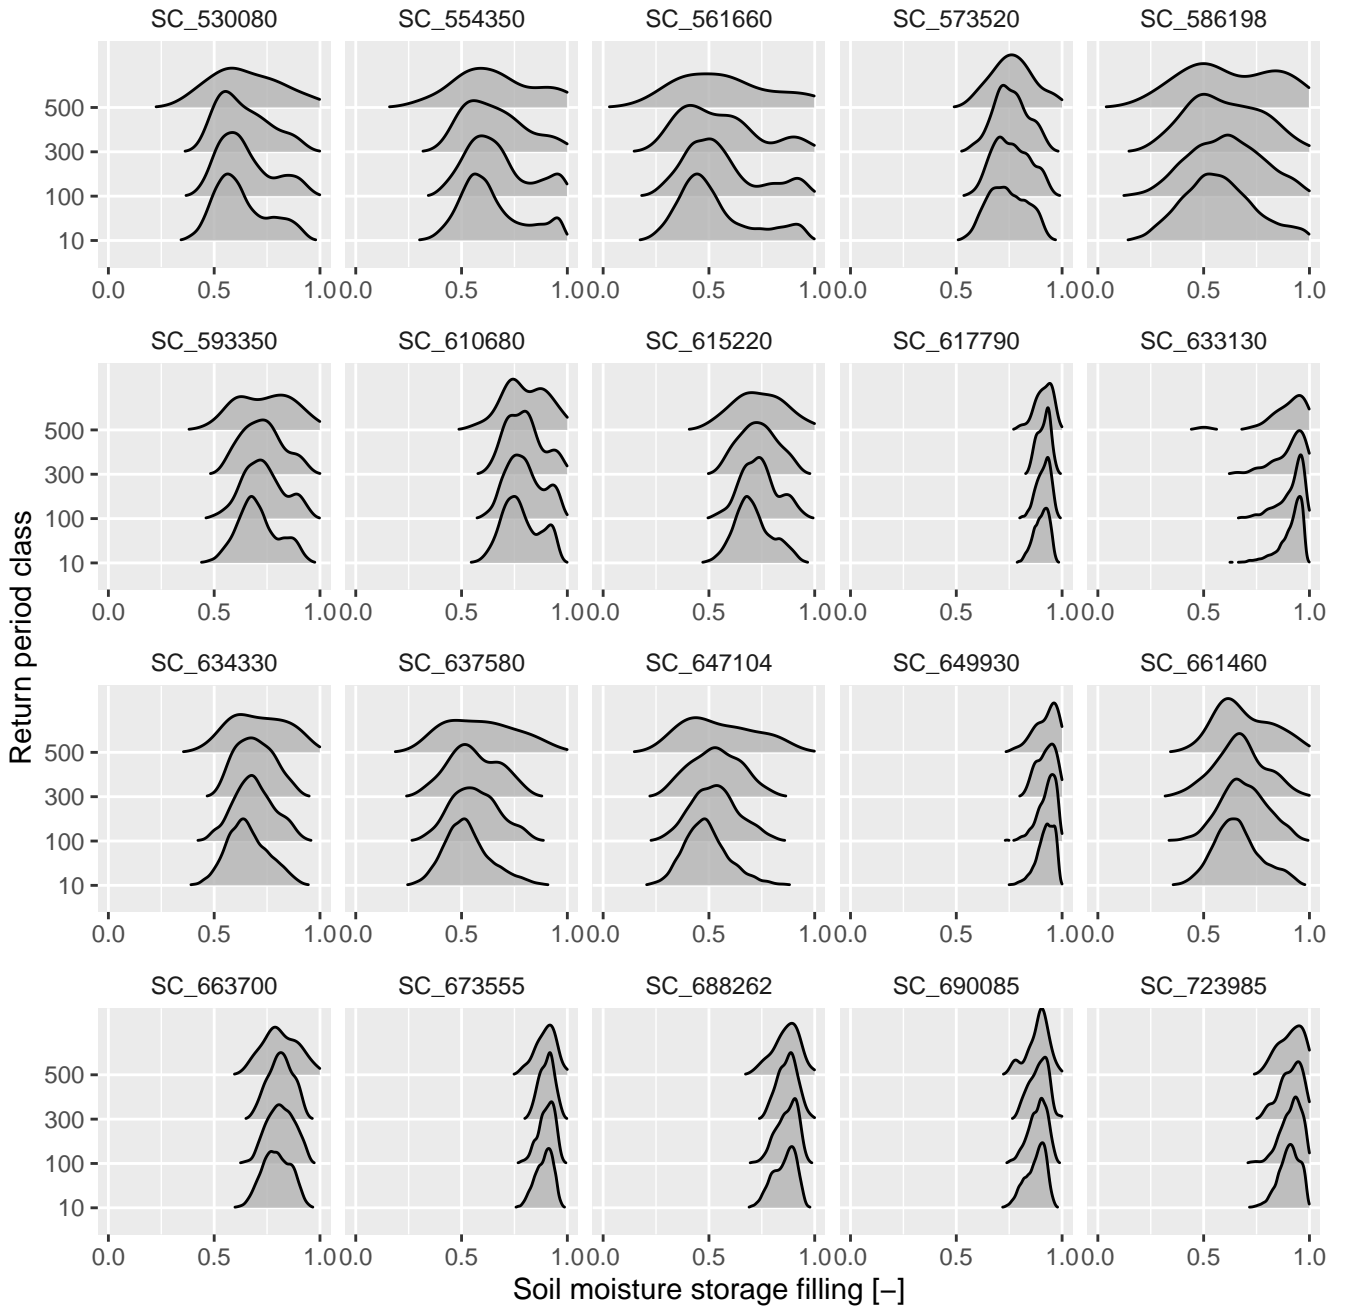

**Figure S3.** Density distributions of the soil moisture in the sub-catchments associated to the flood at the outlet of the Aare basin.

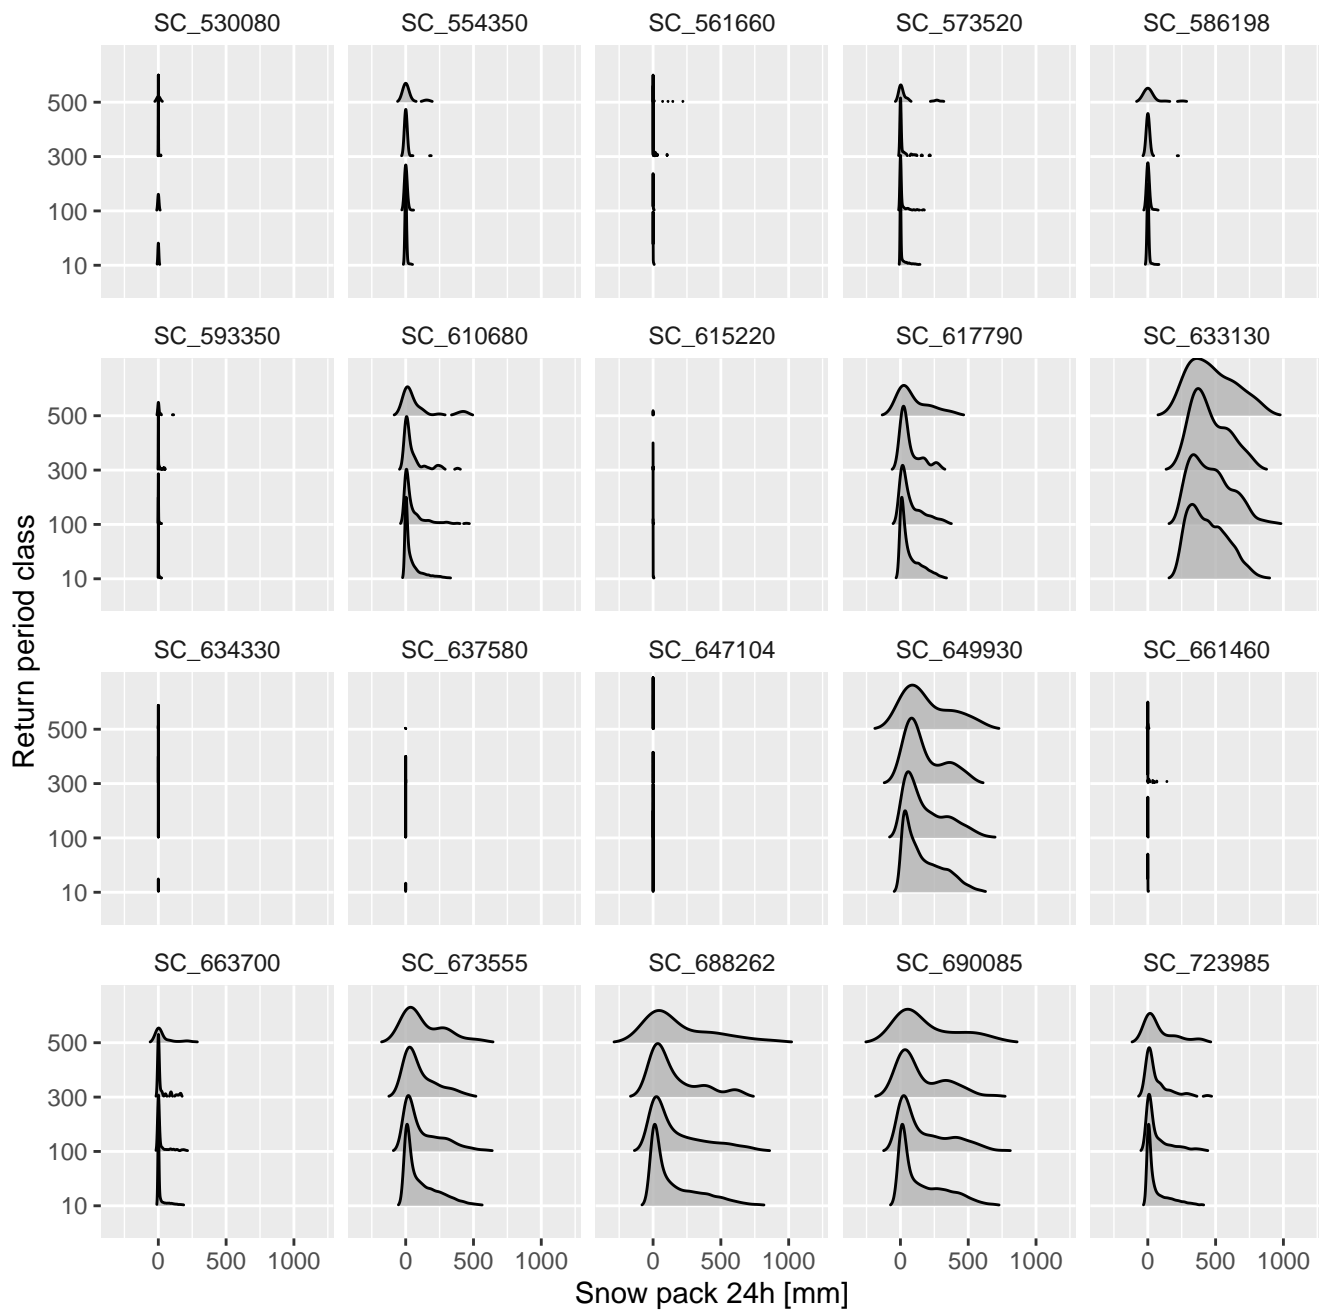

**Figure S4.** Density distributions of the snow pack in the sub-catchments 24 hours before the flood at the outlet of the Aare basin.

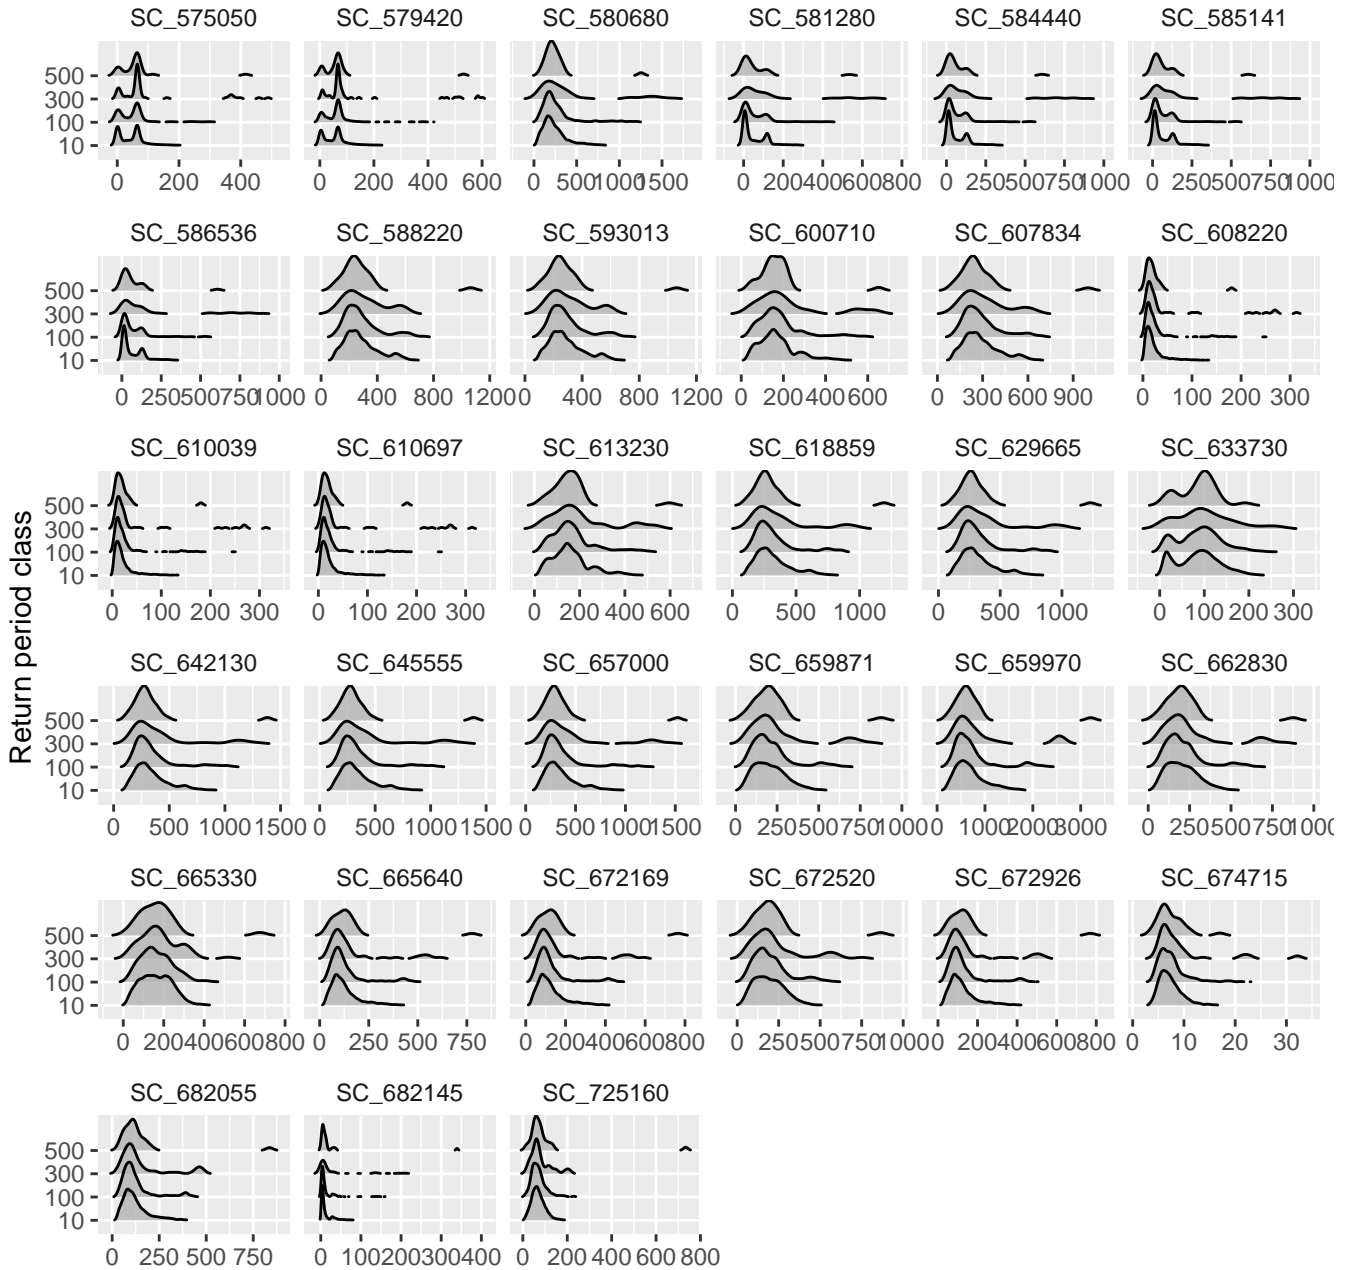

**Figure S5.** Density distributions of the flow conditions at the RS Minerve routing locations associated to the flood at the outlet of the Aare basin.

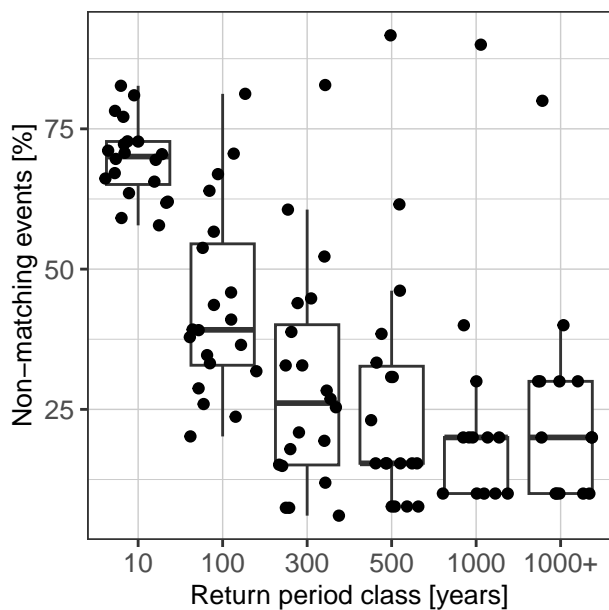

**Figure S6.** Effect of the definition of non-matching events on the absolute number and distribution of the non-matching events using 0.5 times ARCT.

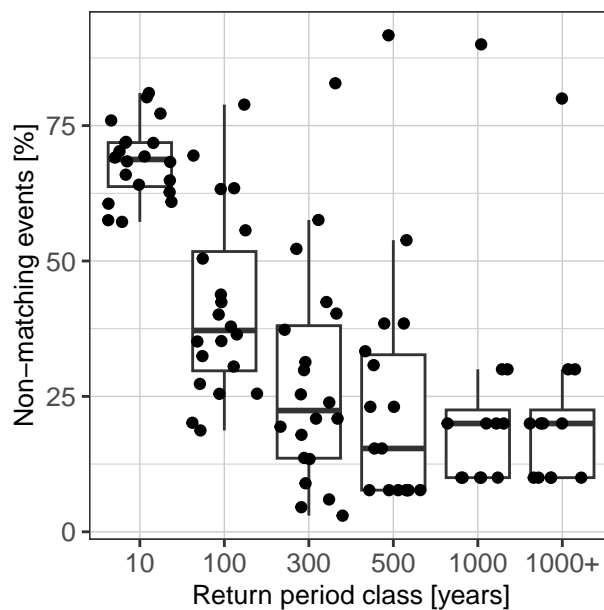

**Figure S8.** Effect of the definition of non-matching events on the absolute number and distribution of the non-matching events using 1.5 times ARCT.

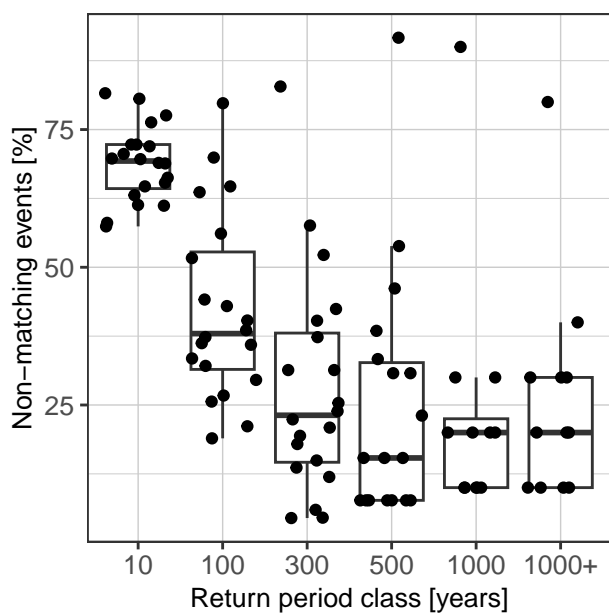

**Figure S7.** Effect of the definition of non-matching events on the absolute number and distribution of the non-matching events using ARCT.

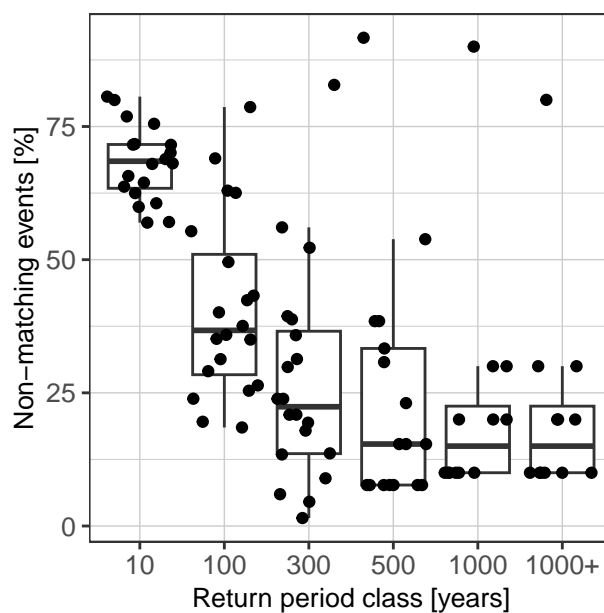

**Figure S9.** Effect of the definition of non-matching events on the absolute number and distribution of the non-matching events using 2 times ARCT.
